# Supplementary material
Source: publisher site journal article supplement (https://www.spandidos-publications.com/6115/downloadSupplementary)

Figure S1. Determination of the half maximal inhibitory concentration values of Adriamycin and docetaxel in MDA-MB-231, MDA-MB-468, and HCC1395 after 48 h incubation. The MTT assay was applied to evaluate the drug resistance of resistant-type BC cells compared with wild-type BC cells. The results indicated that resistant-type cells increased cell viability at various drug concentrations after drug treatment. BC, breast cancer.

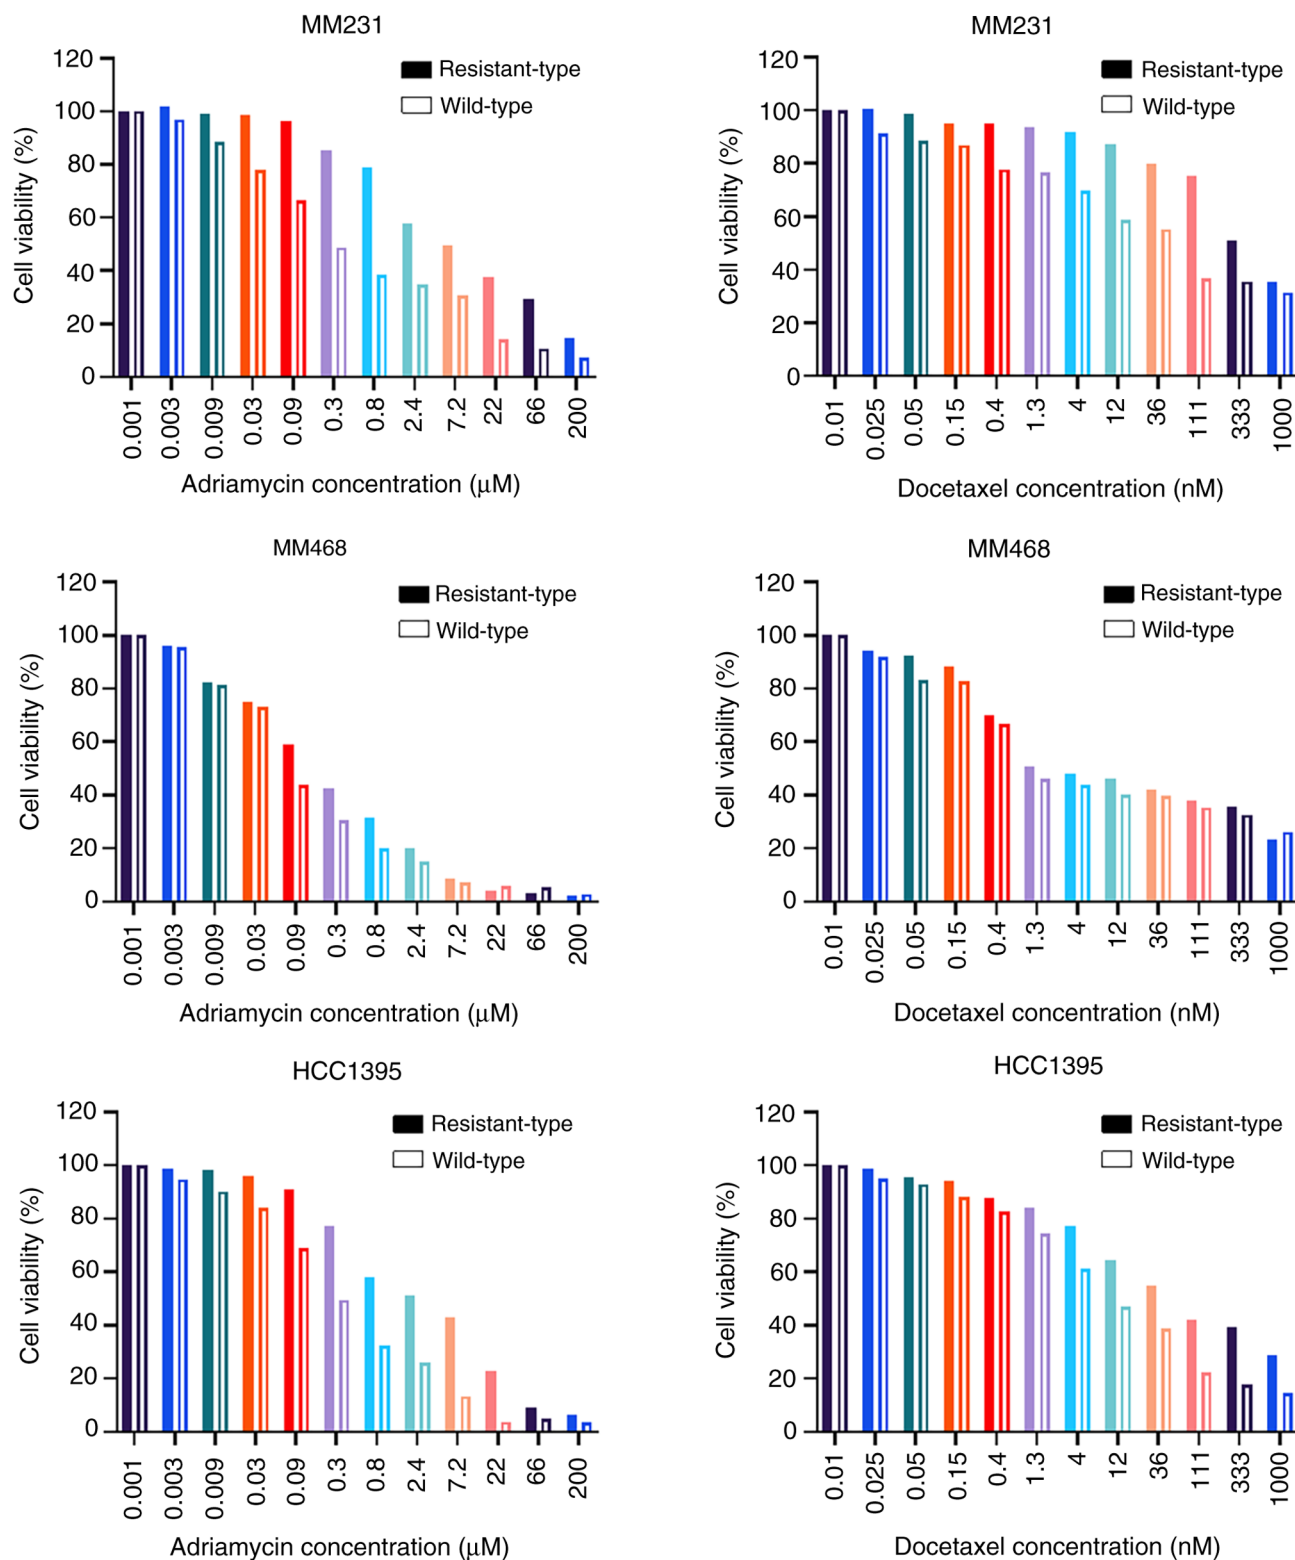

Figure S2. Identification of differentially expressed miRNAs in drug-resistant and -sensitive breast cancer tissues. miRNA or miR, microRNA.

GSE71142: Non-coding RNA profiling by array

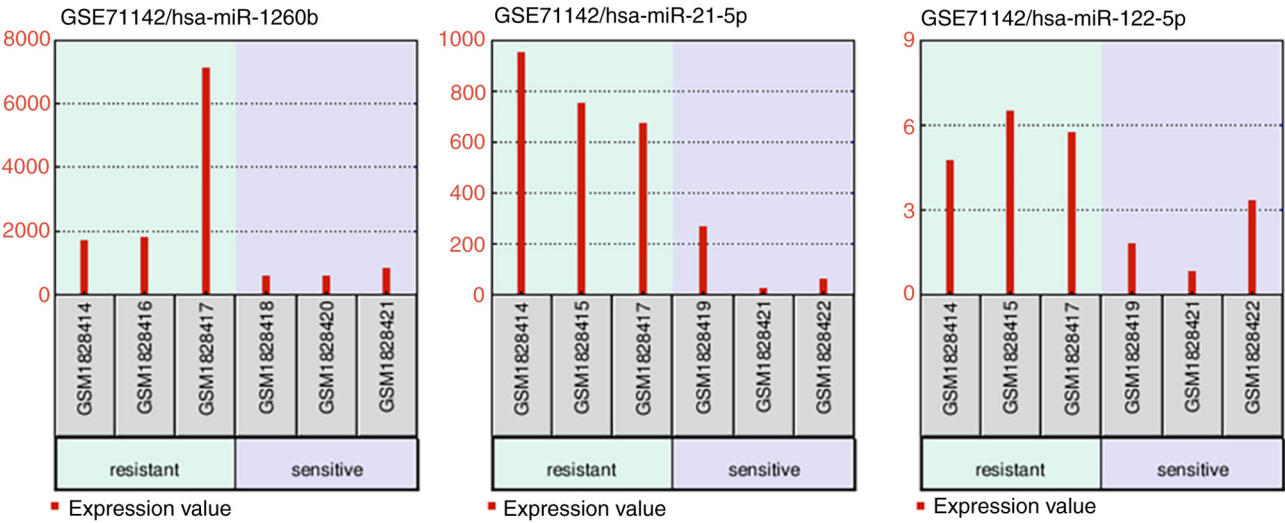

Figure S3. Discriminatory effect of combinations of the five microRNAs was assessed using ROC curves and area under curve values. ROC, receiver operating characteristic.

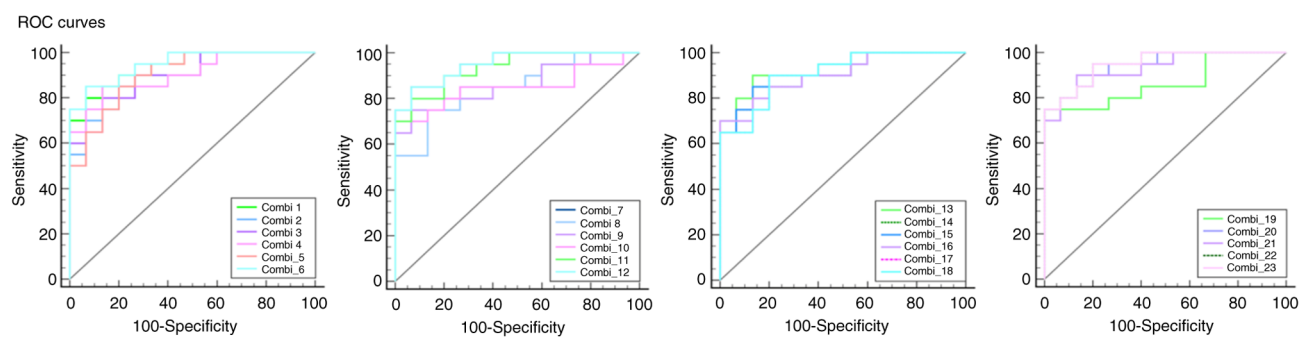

Figure S4. Kaplan-Meier curves and log-rank tests were performed for target genes of candidate miRNAs. miRNA or miR, microRNA.

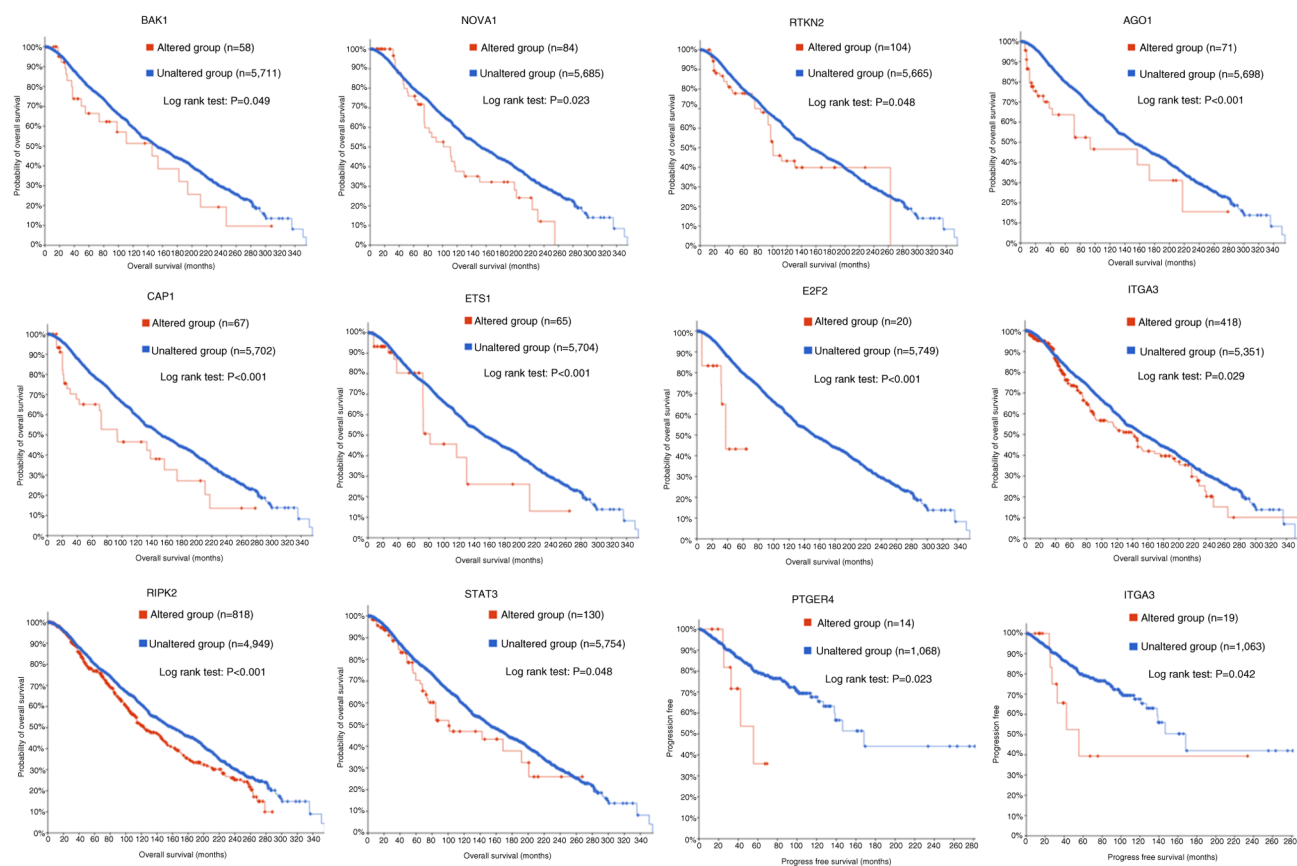

Figure S5. Progression-free and relapse-free survival in patients with breast cancer with miRNA<sup>high R</sup> target genes altered and unaltered groups. miRNA, microRNA; DR<sup>high</sup>, highly related with drug resistance.

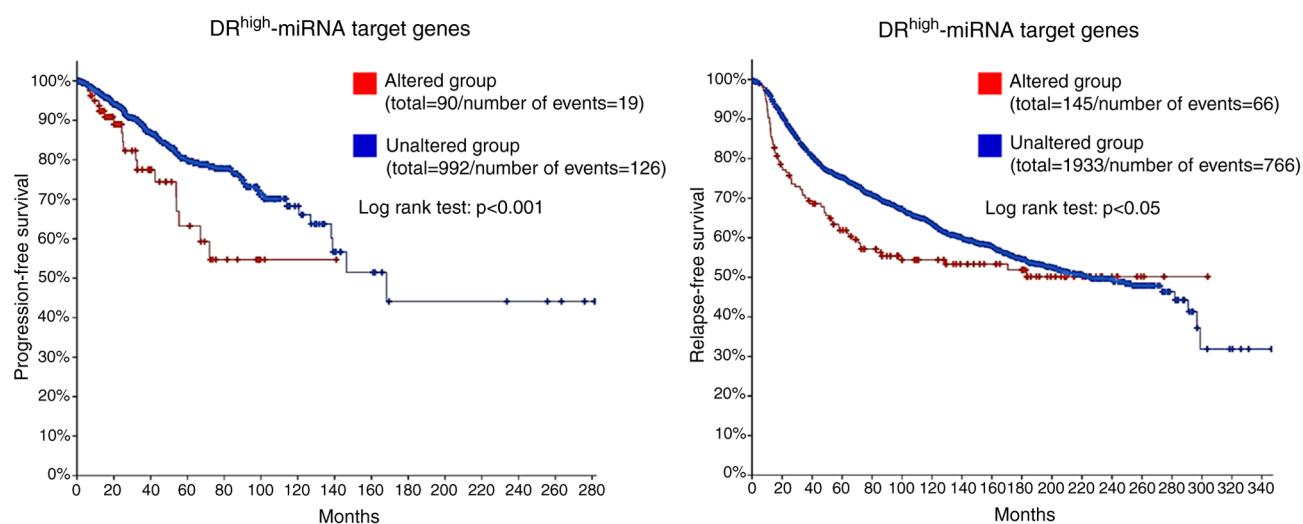

Supplement: Supplementary file 1 [file downloadSupplementary]
